# Supplementary material
Source: PubMed Central journal article supplement (PMC1326031)
Supplement: plntphys_pp.105.071399_1.pdf [file plntphys_pp.105.071399_1.pdf]

**Table 1** Compilation of employed *AtSHM1* specific primers.

The oligonucleotide primers were designed according to the annotated genomic (Genbank Acc. No. ) and cDNA (Genbank Acc. No. AJ271726) sequences of the At4g37930 (*AtSHM1*) locus. The annealing positions of the primers are given relative to the start-ATG of the gene and refer to the 5' end of the oligonucleotide.

| Primer  | Orientation | Sequence                              | Position in genomic DNA | Position in cDNA |
|---------|-------------|---------------------------------------|-------------------------|------------------|
| prSHM1  | forward     | 5' ATT CGA TCC ACT TCA TGT TAC 3'     | 64                      | 64               |
| prSHM2  | reverse     | 5' GTA ACA TGA AGT GGA TCG AAT 3'     | 84                      | 84               |
| prSHM3  | forward     | 5' GTG TCA GCA ATG GAA TCC TCT 3'     | 2723                    | 1426             |
| prSHM4  | reverse     | 5' AGA GGA TTC CAT TGC TGA CAC 3'     | 2743                    | 1446             |
| prSHM5  | forward     | 5' CCT TAT GCC AGA AGC GCG CTC TT 3'  | 843                     | 368              |
| prSHM6  | reverse     | 5' GTC CAC GAA GTG ACT TGT GAG 3'     | 1674                    | 871              |
| prSHM7  | forward     | 5' CCA TAA TTC TGT TAA TCT TAT TCC 3' | -442                    | -                |
| prSHM8  | reverse     | 5' GTT GTC CGG TTA CAG AAC CAT 3'     | 3208                    | -                |
| prSHM9  | forward     | 5' GGC CAT GGC TCT TCG AAG GCT 3'     | 9                       | 9                |
| prSHM10 | forward     | 5' AGC ATG AGA AAG CTA GAC AAT GG 3'  | 476                     | 200              |

---

|         |         |                                       |      |      |
|---------|---------|---------------------------------------|------|------|
| prSHM11 | reverse | 5' CCT CCA TAG TAT CTG GCA CCA 3'     | 712  | 341  |
| prSHM12 | reverse | 5' GGC CTG AAA AGA GTA GCA CTT 3'     | 1396 | 671  |
| prSHM13 | forward | 5' ACA CAA CCA CAC TAT CAC AGG 3'     | 1886 | 996  |
| prSHM14 | reverse | 5' CTC AGG ACT TGT TCT TGG TAT GCT 3' | 2053 | 1082 |

---

**Table 2.** Information on the applied 23 CAPS markers (obtained from the TAIR database [www.arabidopsis.org](http://www.arabidopsis.org), unless indicated otherwise – see footnote).

| Marker                | Chr | Position | Primer 1 (5' → 3')          | Primer 2 (5' → 3')         | Restr. Enz. | Fragments Col-0 (bp) | Fragments Ler (bp) |
|-----------------------|-----|----------|-----------------------------|----------------------------|-------------|----------------------|--------------------|
| T7A14-1               | I   | 7.7 cM   | ATGTGGGTGACGAATACCGTAC      | AATGAAGCTCACCAATGAGGG      | Sspl        | 1269; 231            | 1500               |
| UFO <sup>2</sup>      | I   | 49.6 cM  | AAGGCATCATGACTGTGGTTTTTC    | GTGGCGTTTCAGACGGAGAGG      | TaqI        | 983; 316             | 600; 383; 316      |
| ADH <sup>1</sup>      | I   | 117.5 cM | GCGTGACCATCAAGACTAAT        | AAAAATGGCAACACTTTGAC       | Xba I       | 1291                 | 1097; 262          |
| RGA                   | II  | 1.7 cM   | TTCGATTCAGTTCGGTTTAG        | GTTTAAGCAAGCGAGTATGC       | RsaI        | 140;128              | 263                |
| PhyB <sup>2</sup>     | II  | 34.5 cM  | CAATCCTATGAAGAATGGCG        | ATAAACCATTAGCCCACGTG       | XhoI        | 1100                 | 700; 400           |
| ER                    | II  | 50.6 cM  | GAGTTTATTCTGTGCCAAGTCCTG    | CTAATGTAGTGATCTGCGAGGTAATC | DdeI        | 550                  | 360; 140           |
| VE017                 | II  | 69.1 cM  | GAGCAATCCAGTAGAGGATA        | CTTGAAGCTTAAATCTCAGC       | PstI        | 214;143              | 357                |
| ABI3 <sup>2</sup>     | III | 38.1 cM  | GGGCCTCCGGCTTTTGTCCGCTCGG   | CCACGTCAGCAGGTGGTACCAGATC  | HinfI       | 800; 700; 100        | 1500;100           |
| GL1 <sup>1</sup>      | III | 48.5 cM  | CCATGATCCGAAGAGACTAT        | ATATTGAGTACTGCCTTTAG       | TaqI        | 298; 100; 74; 47     | 372; 100; 47       |
| LD                    | IV  | 17 cM    | CTCATGTACTGGCTATTCCTTGG     | TCGATCAGTCCAAGATGTCGTCG    | PvuII       | 1400 (2x); 900; 500  | 2300; 1400; 500    |
| DET1.1                | IV  | 31.4 cM  | GAGCATCAACAAGATGACC         | CAAAATGTGAATGTCC           | SacI        | 1100                 | 600; 500           |
| G4539                 | IV  | 57.6 cM  | GGACGTAGAATCTGAGAGCTC       | GGTCATCCGTTCCCAGGTAAAG     | HindIII     | 600                  | 480; 120           |
| AG                    | IV  | 63.1 cM  | CAAACACCATTTAATCTTGACA      | CAACAGGTTTCTTCTTCTCTC      | XbaI        | 1366                 | 1073; 293          |
| RPS2 <sup>2</sup>     | IV  | 75.7 cM  | TTCGACGGATGGACTCTCGTG       | CTCAGAGTCTGGACTTGTCG       | Sau3A I     | 605; 180             | 354; 251; 180;     |
| g8300a <sup>3</sup>   | IV  | 81.2 cM  | TAAAAGCTTGGACTGGCGTGATTGACG | CCGAATCCCAGCGGCATTGCCAGGC  | HindIII     | 700                  | 500; 200           |
| F20D10.1 <sup>3</sup> | IV  | 95 cM    | TTAGAGCTCGGTATGTCAGCG       | AACACGTAACGGGATCTGAGC      | EcoR V      | 1433                 | 923; 510           |
| F20D10.2 <sup>3</sup> | IV  | 95 cM    | AGAGAGTCACTGAGTGG           | ATCGAACCTGTGATCCAATGC      | EcoR I      | 735; 438             | 1193               |
| F23K16                | IV  | 103 cM   | TGTACGTAATATGTCGCATGC       | CTTGGTTATTGCATAGAAGCC      | Xho I       | 837; 451             | 1288               |

|                    |   |         |                          |                        |      |                |                |
|--------------------|---|---------|--------------------------|------------------------|------|----------------|----------------|
| ASA1 <sup>1</sup>  | V | 18.3 cM | CCTCTAGCCTGAATAACAGAAC   | CTTACTCCTGTTCTTGCTTAC  | BclI | 1042; 686      | 686; 553; 489  |
| PAT1 <sup>2</sup>  | V | 26 cM   | GTATGAGAACATAGTAACCCCATG | GTCGACGTGGTGCGGTGGGTTG | Ddel | 1000; 600; 300 | 1000; 900      |
| PhyC <sup>2</sup>  | V | 71.1 cM | CTACAGAATCGTCCTCAACG     | CCTAATGGAGAATCATTCCGG  | PstI | 1700; < 300    | 800; 700; <300 |
| EG7F2 <sup>2</sup> | V | 117 cM  | GCATAGAATTTGACGATAACGAGC | GATCTGTGTAGGACTACGAGAC | XbaI | 1200           | 700; 500       |
| MUB3-1             | V | 127 cM  | CCACGCGAAACGGCTGACGTCG   | AGCTTATTCAGGTACGTGAATG | AccI | 1134           | 640; 494       |

<sup>1</sup> see Konieczny and Ausubel, 1993

<sup>2</sup> see Baumbusch et al., 2001

<sup>3</sup> this paper
